# Supplementary material
Source: Springer Nature journal article supplement (https://www.springermedizin.de/resource/supplementary/12955_2010_748_MOESM8_ESM.pdf/9560910)

# Study

Tubert-Jeannin (France)

Naito (Japan)

Summary effect

Difference in means

6

8

10

12

14

Comparison

0-19 vs. 20-32 teeth

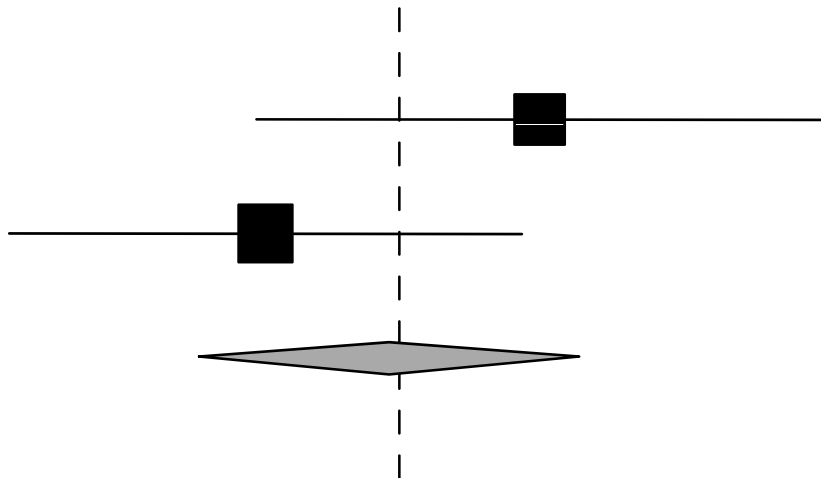

Supplement: MOESM8 [file 9560910]
